# Supplementary material for: Analysis of survival and hatching transcriptomes from potato cyst nematodes, Globodera rostochiensis and G. pallida
Source: PubMed Central journal article supplement (PMC5478601; doi:10.1038/s41598-017-03871-x), 2017-06-20
Supplement: 41598_2017_3871_MOESM1_ESM.pdf [file 41598_2017_3871_MOESM1_ESM.pdf]

**Analysis of survival and hatching transcriptomes from  
potato cyst nematodes, *Globodera rostochiensis* and *G.*  
*pallida***

Marc-Olivier Duceppe, Joël Lafond-Lapalme, Juan Emilio Palomares-Rius, Michaël  
Sabeh, Vivian Blok, Peter Moffett and Benjamin Mimeo

**Supplementary information**

Figure S1

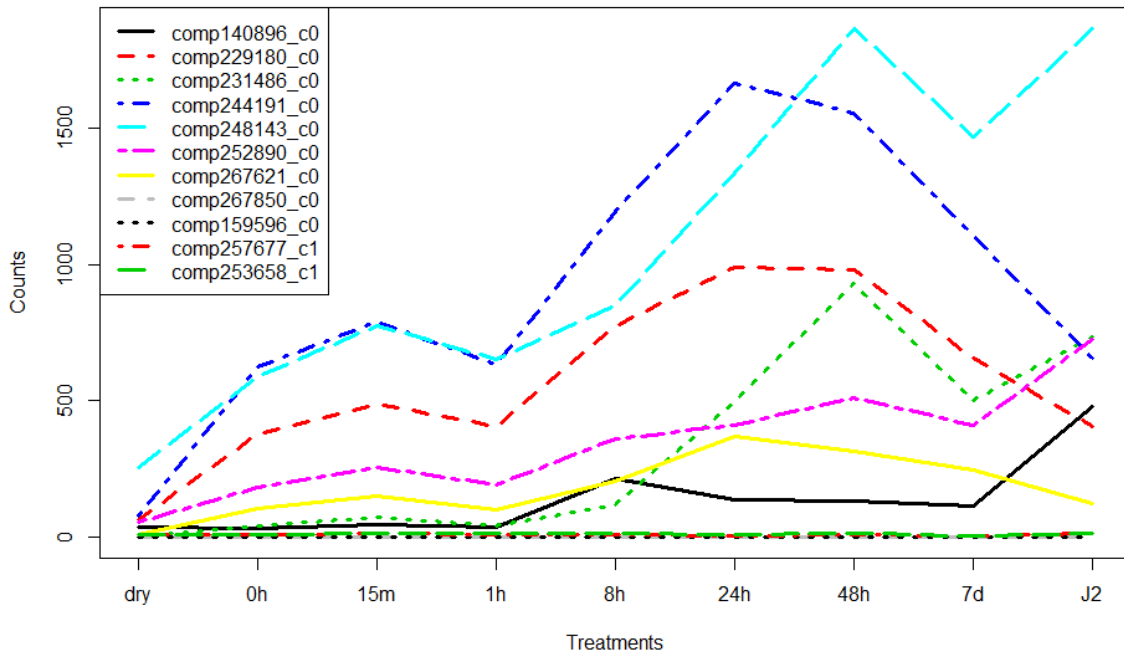

Figure S1: Expression pattern of 11 neprilysin genes in *G. rostochiensis*. Trinity transcriptome was used to measure gene expression. Treatment are dry cysts (dry), hydrated eggs (0h), and hydrated eggs exposed to PRD for 15 min, 1h, 8h, 24h, 48h and 7 days and hatched J2.

**Table S1. *Globodera rostochiensis* and *G. pallida* Trinity transcriptome assembly statistics.**

| Metric                    | <i>Globodera<br/>rostochiensis</i> | <i>Globodera<br/>pallida</i> |
|---------------------------|------------------------------------|------------------------------|
| Paired-end reads (100 bp) | 511,208,631                        | 213,156,265                  |
| Normalized pairs (30 X)   | 41,045,675                         | 7,903,581                    |
| Trinity transcripts       | 1,075,007                          | 300,796                      |
| Trinity components        | 239,134                            | 31,346                       |
| Final transcriptome       | <b>93,089</b>                      | <b>31,346</b>                |
| Longest contig (bp)       | 18,280                             | 15,960                       |
| N50 (bp)                  | 1,293                              | 2,527                        |
| GC (%)                    | 47                                 | 47                           |

**Table S2 to S5 See excel file:**

**S2 DEGs\_Grost\_Trinity\_fold\_blast(S2).xlsx**

**S3 DEGs\_Grost\_augustus\_fold\_blast(S3).xlsx**

**S4 DEGs\_Gpal\_Trinity\_fold\_blast(S4).xlsx**

**S5 DEGs\_Gpal\_augustus\_fold\_blast(S5).xlsx**

**Table S6:** Cluster of transcripts from *G. rostochiensis* Trinity transcriptome with expression similar to *trehalose 6-phosphate synthase*.

| <b>Contig</b> | <b>up-regulated Treatment</b> | <b>BLAST</b>                                                     | <b>Fold Change hydrated cyst vs dry cyst</b> |
|---------------|-------------------------------|------------------------------------------------------------------|----------------------------------------------|
| comp24112_c0  | Dry                           | histone h3                                                       | 1.9                                          |
| comp224595_c0 | Dry                           | mgc83793 protein                                                 | 1.6                                          |
| comp246692_c0 | Dry                           | ring finger and cch-type zinc finger domain-containing protein 2 | 4.0                                          |
| comp251106_c0 | Dry                           | tubulin polyglutamylase ttl11-like                               | 2.0                                          |
| comp254088_c1 | Dry                           | serine palmitoyltransferase 2                                    | 1.7                                          |
| comp256950_c0 | Dry                           | ribosomal protein s7p s5e containing protein                     | 1.3                                          |
| comp266765_c0 | Dry                           | NA                                                               | 3.7                                          |
| comp188635_c0 | Dry                           | histone                                                          | 1.9                                          |
| comp226839_c0 | Dry                           | protein cogc-8                                                   | 1.6                                          |
| comp248755_c0 | Dry                           | NA                                                               | 2.0                                          |
| comp251314_c3 | Dry                           | adenylate kinase 2                                               | 2.5                                          |
| comp254759_c0 | Dry                           | probable trans-2-enoyl-mitochondrial-like                        | 2.0                                          |
| comp257619_c0 | Dry                           | transcription initiation factor iib                              | 1.6                                          |
| comp208184_c0 | Dry                           | hypothetical protein Bm1_35525                                   | 4.3                                          |
| comp236180_c0 | Dry                           | cre-rle-1 protein                                                | 3.7                                          |
| comp249325_c0 | Dry                           | g10 protein                                                      | 1.9                                          |

|               |     |                                                                       |     |
|---------------|-----|-----------------------------------------------------------------------|-----|
| comp252340_c0 | Dry | cytoplasmic intermediate filament protein                             | 2.1 |
| comp254763_c0 | Dry | NA                                                                    | 1.9 |
| comp257819_c0 | Dry | probable dolichyl pyrophosphate glc1man9 c2 alpha-glucosyltransferase | 2.8 |
| comp220998_c0 | Dry | cop9 signalosome complex subunit                                      | 1.9 |
| comp238646_c0 | Dry | NA                                                                    | 4.0 |
| comp250328_c1 | Dry | NA                                                                    | 1.9 |
| comp253394_c0 | Dry | g10 protein                                                           | 1.7 |
| comp256639_c0 | Dry | NA                                                                    | 2.1 |
| comp258202_c0 | Dry | islet cell autoantigen 1                                              | 2.3 |
| comp222505_c0 | Dry | cytoplasmic intermediate filament protein                             | 2.7 |
| comp246505_c0 | Dry | NA                                                                    | 1.6 |
| comp250328_c0 | Dry | NA                                                                    | 3.5 |
| comp253978_c0 | Dry | polypyrimidine tract binding protein                                  | 1.8 |
| comp256753_c0 | Dry | trehalose 6-phosphate synthase                                        | 3.2 |
| comp258460_c2 | Dry | NA                                                                    | 2.2 |

**Table S7:** Cluster of transcripts from *G. rostochiensis* Trinity transcriptome with putative expression patterns of genes involved in cyst survival.

| <b>Contig</b> | <b>up-regulated Treatment</b> | <b>BLAST</b>                      | <b>Fold change dry cyst vs hydrated cyst</b> |
|---------------|-------------------------------|-----------------------------------|----------------------------------------------|
| comp89407_c0  | Dry                           | NA                                | 3.7                                          |
| comp140507_c0 | Dry                           | NA                                | 3.0                                          |
| comp204557_c0 | Dry                           | Selenoprotein                     | 6.1                                          |
| comp232167_c0 | Dry                           | hypothetical protein<br>CRE_16869 | 2.0                                          |
| comp248011_c0 | Dry                           | NA                                | 2.0                                          |
| comp250515_c1 | Dry                           | Annexin                           | 2.3                                          |
| comp255917_c0 | Dry                           | lysine histidine transporter      | 2.1                                          |
| comp256424_c1 | Dry                           | Zinc finger protein               | 1.7                                          |
| comp258276_c1 | Dry                           | briggsae cbr-pap-1 protein        | 2.8                                          |
| comp258560_c0 | Dry                           | NA                                | 2.8                                          |

**Table S8:** Cluster of transcripts from *G. rostochiensis* Trinity transcriptome with expression similar to *nep-1*.

| <b>Contig</b> | <b>Up-regulated Treatment</b> | <b>BLAST</b>                                              | <b>Mean fold-change in up-regulated hatching treatments</b> |
|---------------|-------------------------------|-----------------------------------------------------------|-------------------------------------------------------------|
| comp91041_c0  | 48h-7d-J2                     | gland protein g20e03                                      | 4.9                                                         |
| comp140896_c0 | 8h-J2                         | protein nep-1                                             | 6.5                                                         |
| comp213450_c1 | 8h-J2                         | nucleoside diphosphate kinase                             | 24.3                                                        |
| comp220622_c0 | J2                            | Patched family protein                                    | NA                                                          |
| comp226361_c0 | J2                            | NA                                                        | NA                                                          |
| comp235689_c0 | J2                            | heat shock protein hsp20                                  | NA                                                          |
| comp241314_c0 | J2                            | beta-endoglucanase-1 precursor                            | NA                                                          |
| comp242450_c0 | 7d-J2                         | major facilitator superfamily domain-containing protein 8 | NA                                                          |
| comp249021_c0 | 48h-J2                        | NA                                                        | 5.3                                                         |
| comp251094_c0 | J2                            | patched family protein                                    | NA                                                          |
| comp263359_c0 | J2                            | NA                                                        | NA                                                          |



**Table S9:** Cluster of transcripts from *G. rostochiensis* Trinity transcriptome with putative expression pattern of genes involved in hatching.

| <b>Contig</b> | <b>Up-regulated treatment</b> | <b>BLAST</b>                                                                              | <b>mean fold change between up-regulated hatching treatment</b> |
|---------------|-------------------------------|-------------------------------------------------------------------------------------------|-----------------------------------------------------------------|
| comp152061_c0 | 24h-48h                       | pectate lyase 2                                                                           | 8.3                                                             |
| comp178494_c0 | 48h                           | galactosylgalactosylxylosylprotein 3-beta-glucuronosyltransferase 2                       | 12.1                                                            |
| comp252092_c1 | 48h                           | NA                                                                                        | 9.2                                                             |
| comp79822_c0  | 24h-48h                       | pectate lyase 2                                                                           | 9.8                                                             |
| comp186241_c0 | 24h-48h                       | Peptidase M14, carboxypeptidase A domain and Proteinase inhibitor                         | 6.1                                                             |
| comp220435_c0 | 24h-48h                       | Peptidase M14, carboxypeptidase A domain and Proteinase inhibitor                         | 4.9                                                             |
| comp143987_c0 | 24h-48h                       | fatty acid elongation protein 3                                                           | 7.0                                                             |
| comp205597_c0 | 24h-48h                       | carbonate dehydratase                                                                     | 5.3                                                             |
| comp179924_c0 | 24h-48h                       | ABC transporter substrate-binding protein                                                 | 6.5                                                             |
| comp204845_c0 | 48h                           | lysosomal acid phosphatase                                                                | 5.3                                                             |
| comp146670_c0 | 24h-48h                       | pectate lyase 1                                                                           | 5.9                                                             |
| comp236889_c0 | 24h-48h                       | general substrate transporter and Major facilitator superfamily domain-containing protein | 6.1                                                             |
| comp197008_c0 | 24h-48h                       | ABC transporter substrate-binding protein                                                 | 6.7                                                             |

**Table S10: Description of primers used in this study.**

| <b>Gene symbol</b> | <b>Gene description</b>       | <b>Forward primer</b>  | <b>Reverse primer</b> | <b>Amplicon length (bp)</b> | <b>Amplification efficiency</b> |
|--------------------|-------------------------------|------------------------|-----------------------|-----------------------------|---------------------------------|
| Pmp-3              | Putative membrane transporter | CTGGTTGCTGAGCAGGATAA   | GATGAAGCCCGATTGGTAGAA | 102                         | 1.92                            |
| AaRS               | Aminoacyl tRNA synthetase     | CGGATTTACGGACCTTGTCTAC | GGGAATCCGTCACGCTTAAT  | 84                          | 1.98                            |
| GR                 | Glutathione reductase         | TTGAGAGACCATGCCGATTAC  | GAGTTGAGACGCCGAATGT   | 102                         | 1.90                            |
| Nep-1              | Neprilysin                    | GCTGAAATGGTGGAGAAAGTG  | TTTGACGCCCGAGTAGAAG   | 457                         | 1.91                            |
